# Supplementary material for: Cage-Assembled Antigenic Particle Vaccine (CAP-V) Orchestrates Balanced Th1/Th2 Immunity and Potent Protection Against Alveolar Echinococcosis
Source: Research Square preprint supplement (doi:10.21203/rs.3.rs-8607746/v1), 2026-01-23
Supplement: Supplementary file 1 [file 68bb21f69e5b40cfd73f6119.docx]

**Supporting Information**

**Cage-Assembled Antigenic Particle Vaccine (CAP-V) Orchestrates Balanced Th1/Th2 Immunity and Potent Protection Against Alveolar Echinococcosis**

*Yang Zanga, Jian Fengc, Yutong Penga, Wei Cuia, Wenzhe Wanga, Shule Wanga,* *Yimiao Li**d†, Lei Xiua†, Xinyu Lic†, Wei Hu a* *,b†*

1. *State Key Laboratory of Reproductive Regulation & Breeding of Grassland Livestock, Institutes of Biomedical Sciences, School of Life Sciences, Inner Mongolia University, Hohhot 010000, China.*
2. *State Key Laboratory of Genetics and Development of Complex Phenotypes, Ministry of Education Key Laboratory of Contemporary Anthropology, School of Life Sciences, Fudan University, Shanghai 200438, China*
3. *Inner Mongolia Key Laboratory for Molecular Regulation of the Cell, School of Life Sciences, Inner Mongolia University, Hohhot, 010020, PR China.*
4. *School of Automation and Electrical Engineering, Inner Mongolia University of Science and Technology, Baotou 014010, China*

†Corresponding author.


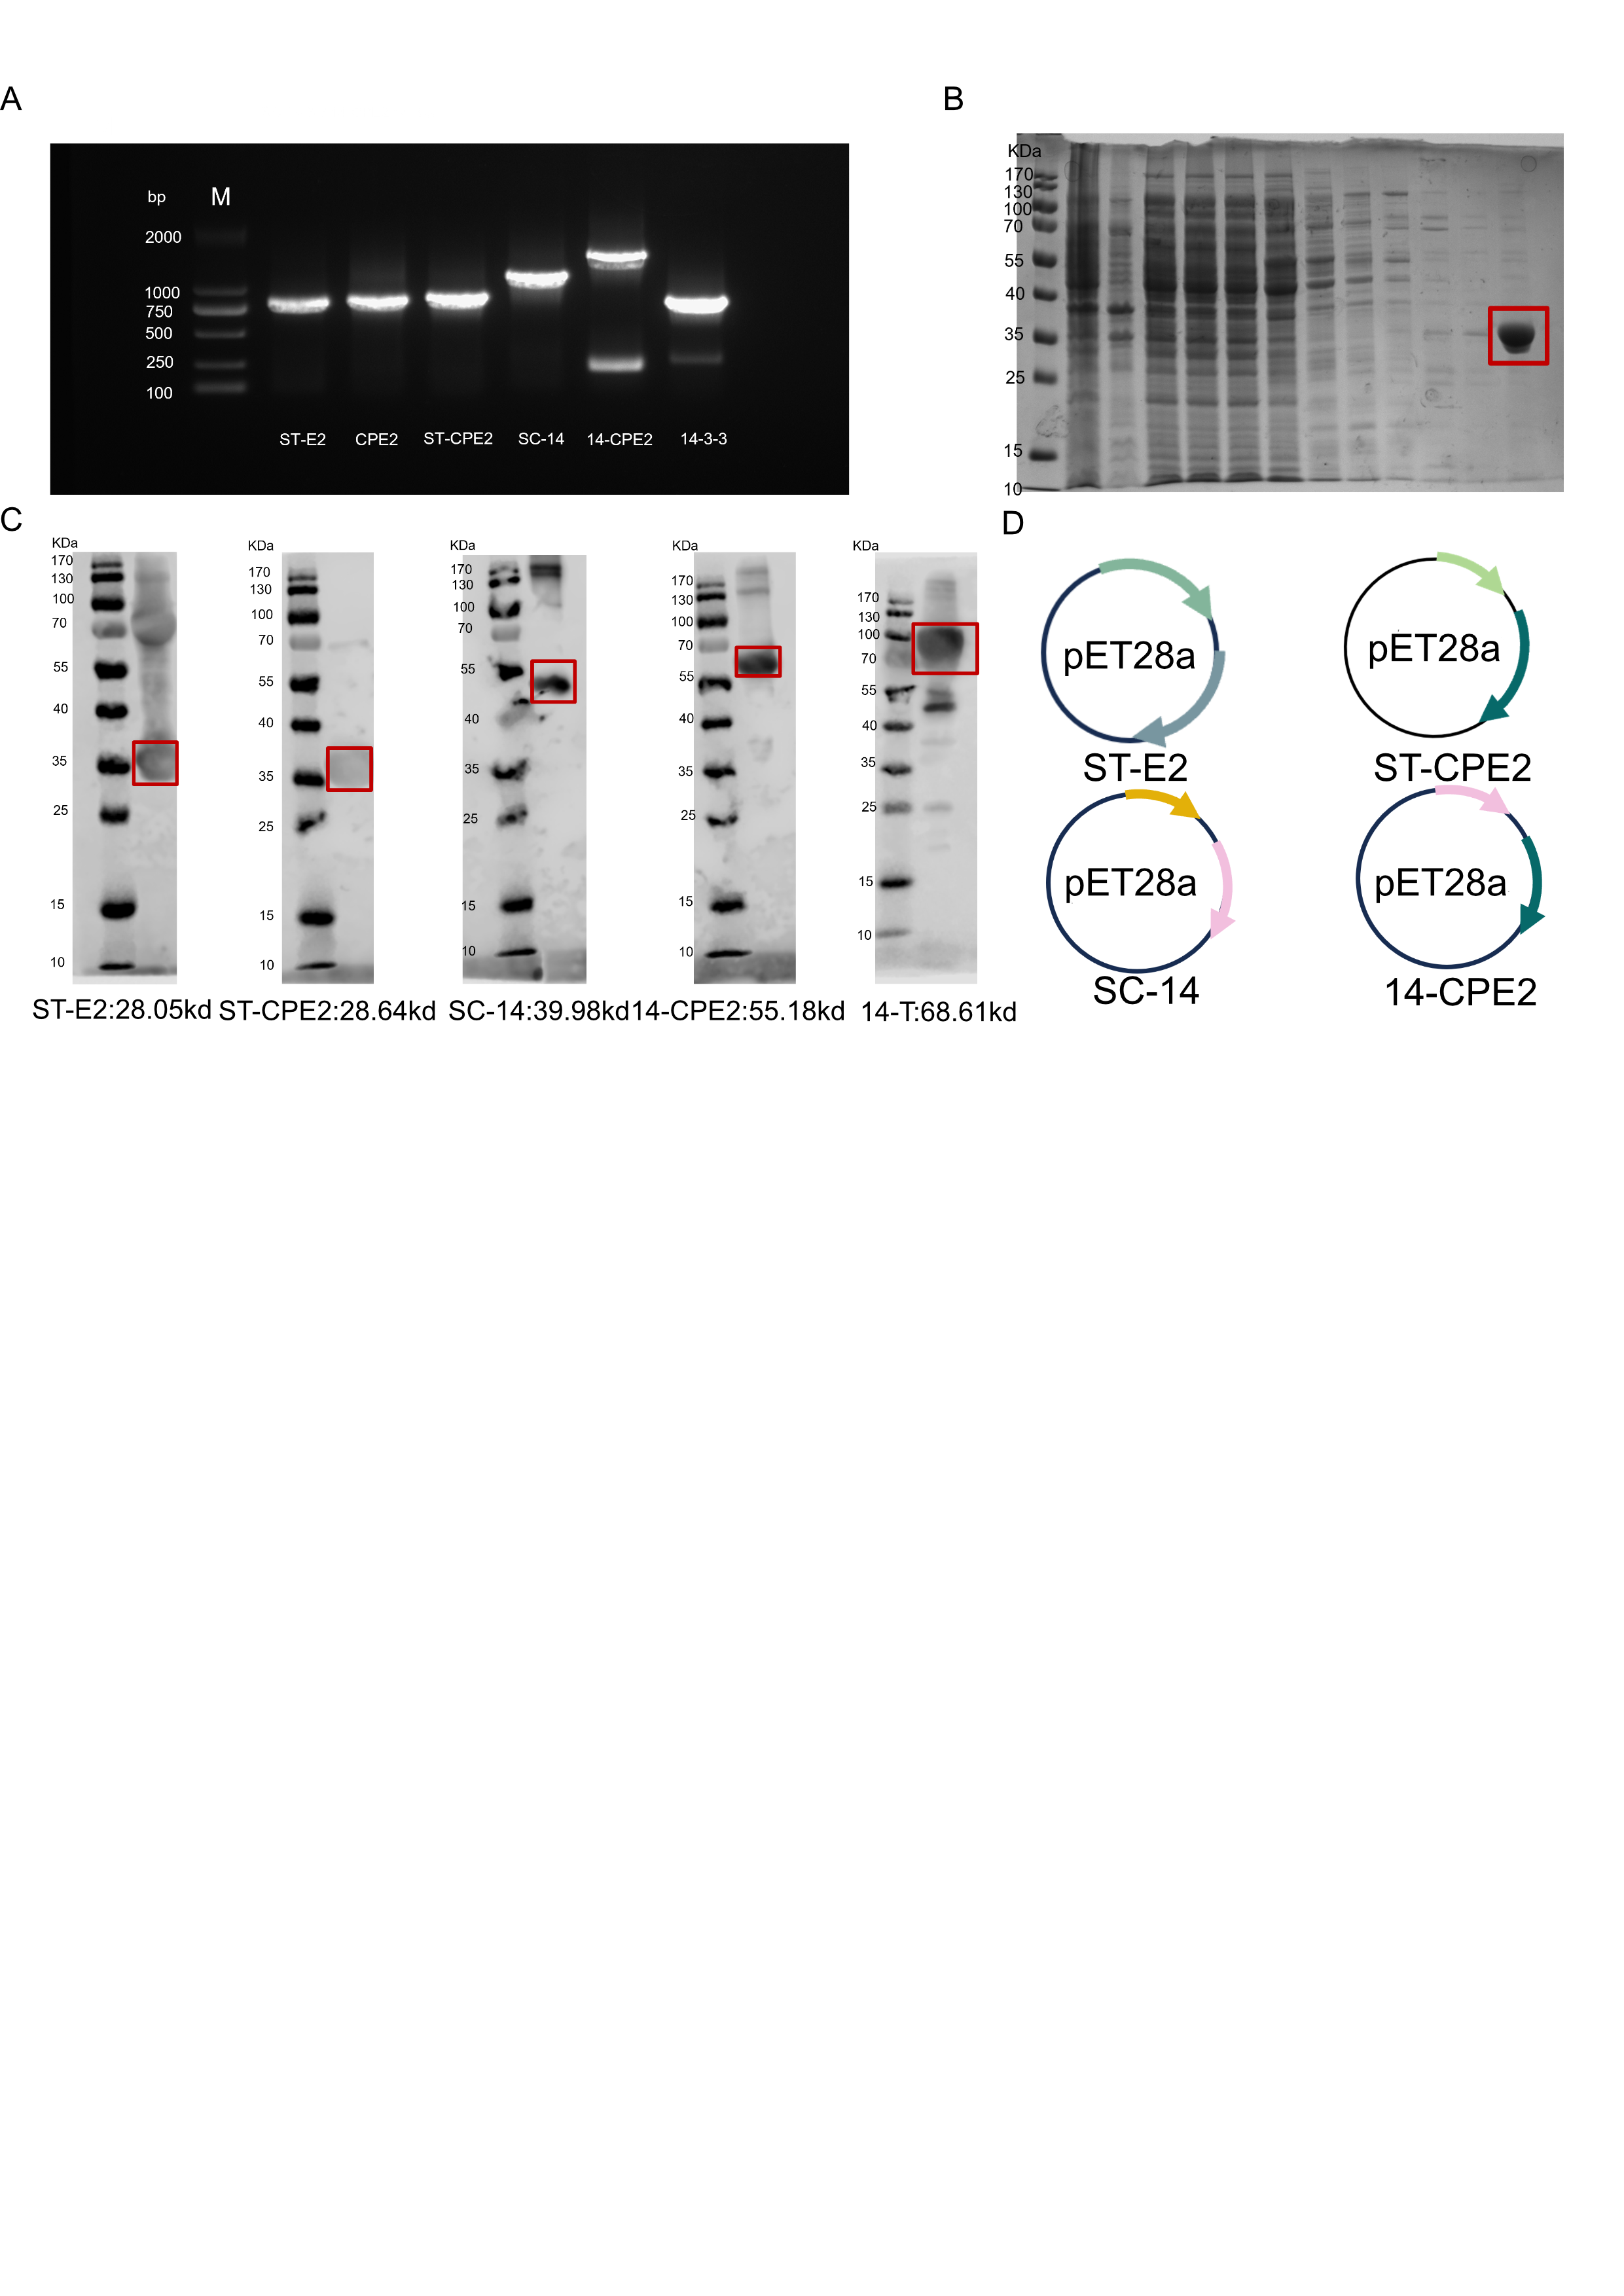


**Figure. S1 Plasmid Construction and Validation.**

(A) Agarose gel electrophoresis of nucleic acid fragments of ST-E2, CP-E2, ST-CP-E2, SC-14, 14-CP-E2 and 14-3-3. (B) SDS-PAGE analysis of the recombinant Em14-3-3 protein. (C) WB analysis of ST-E2, ST-CP-E2, SC-14, 14-CP-E2, 14-T and Em14-3-3. (D) Schematic diagram of plasmid construction.


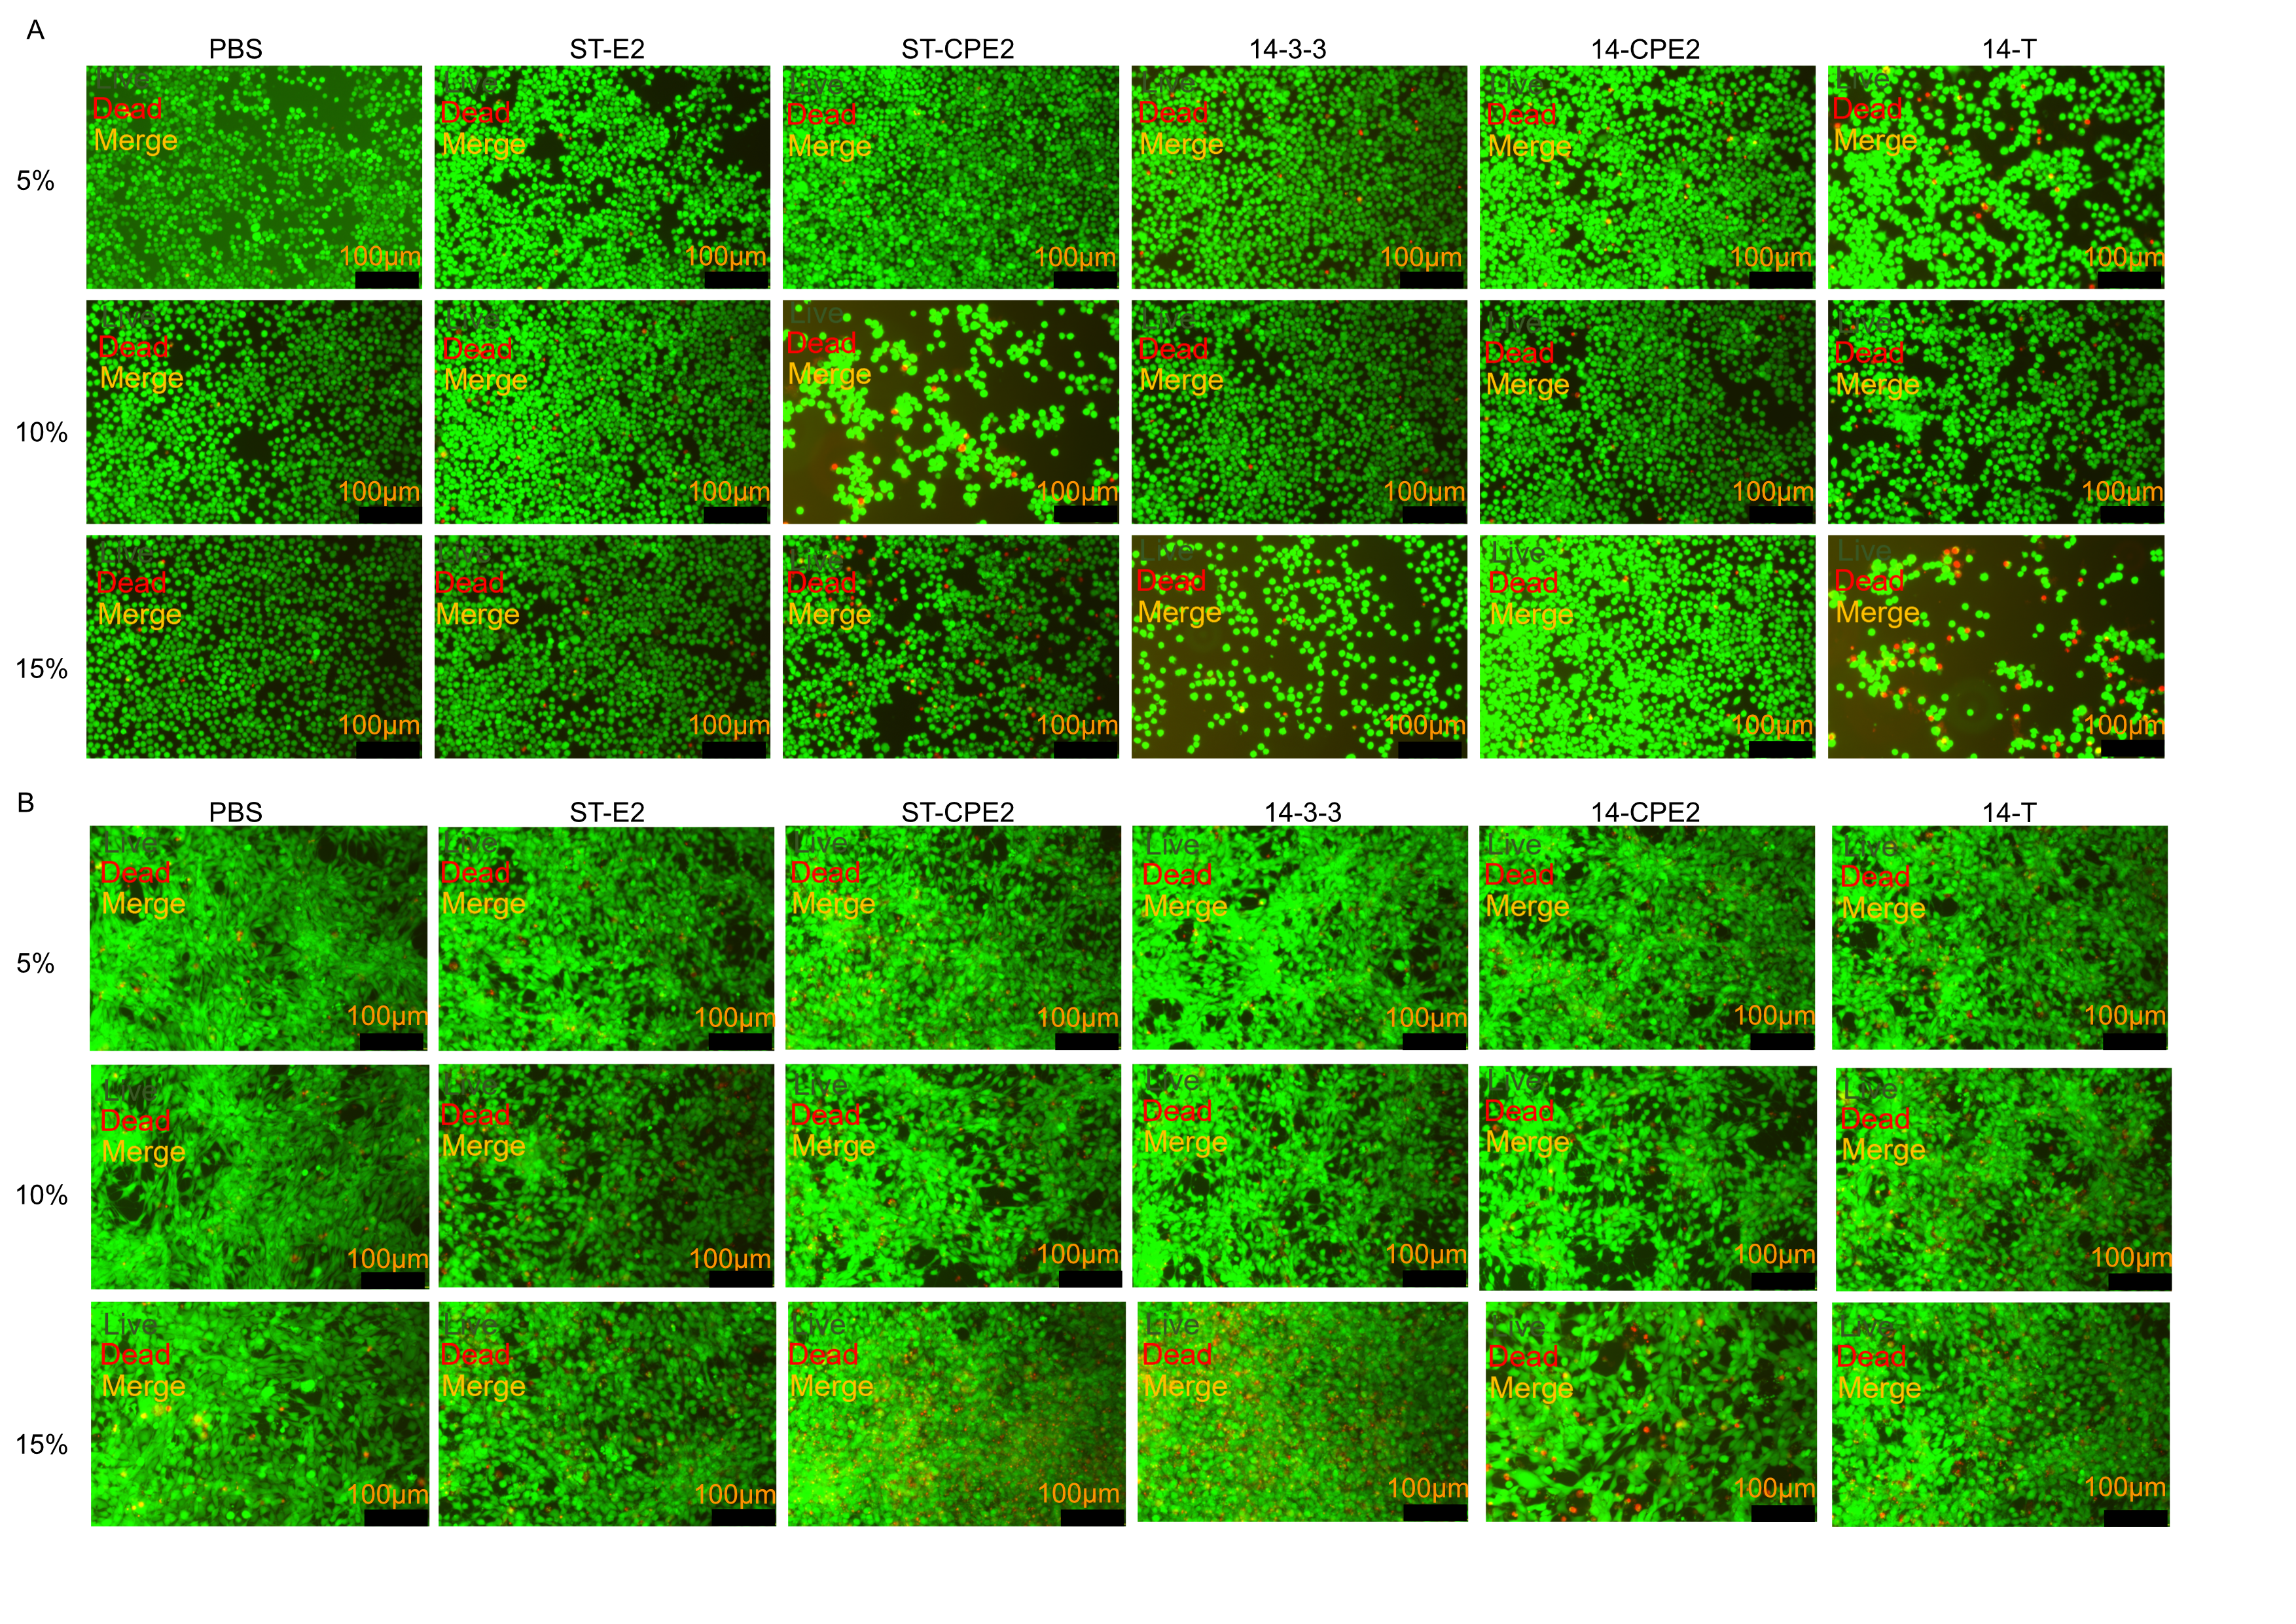


**Figure. S2 Live/Dead Staining of Cells.**

(A) Morphology and viability of DC2.4 cells cultured in media containing the protein at concentrations of 5%, 10%, and 15%. (B) Morphology and viability of HSC cells cultured in media containing the protein at concentrations of 5%, 10%, and 15%.


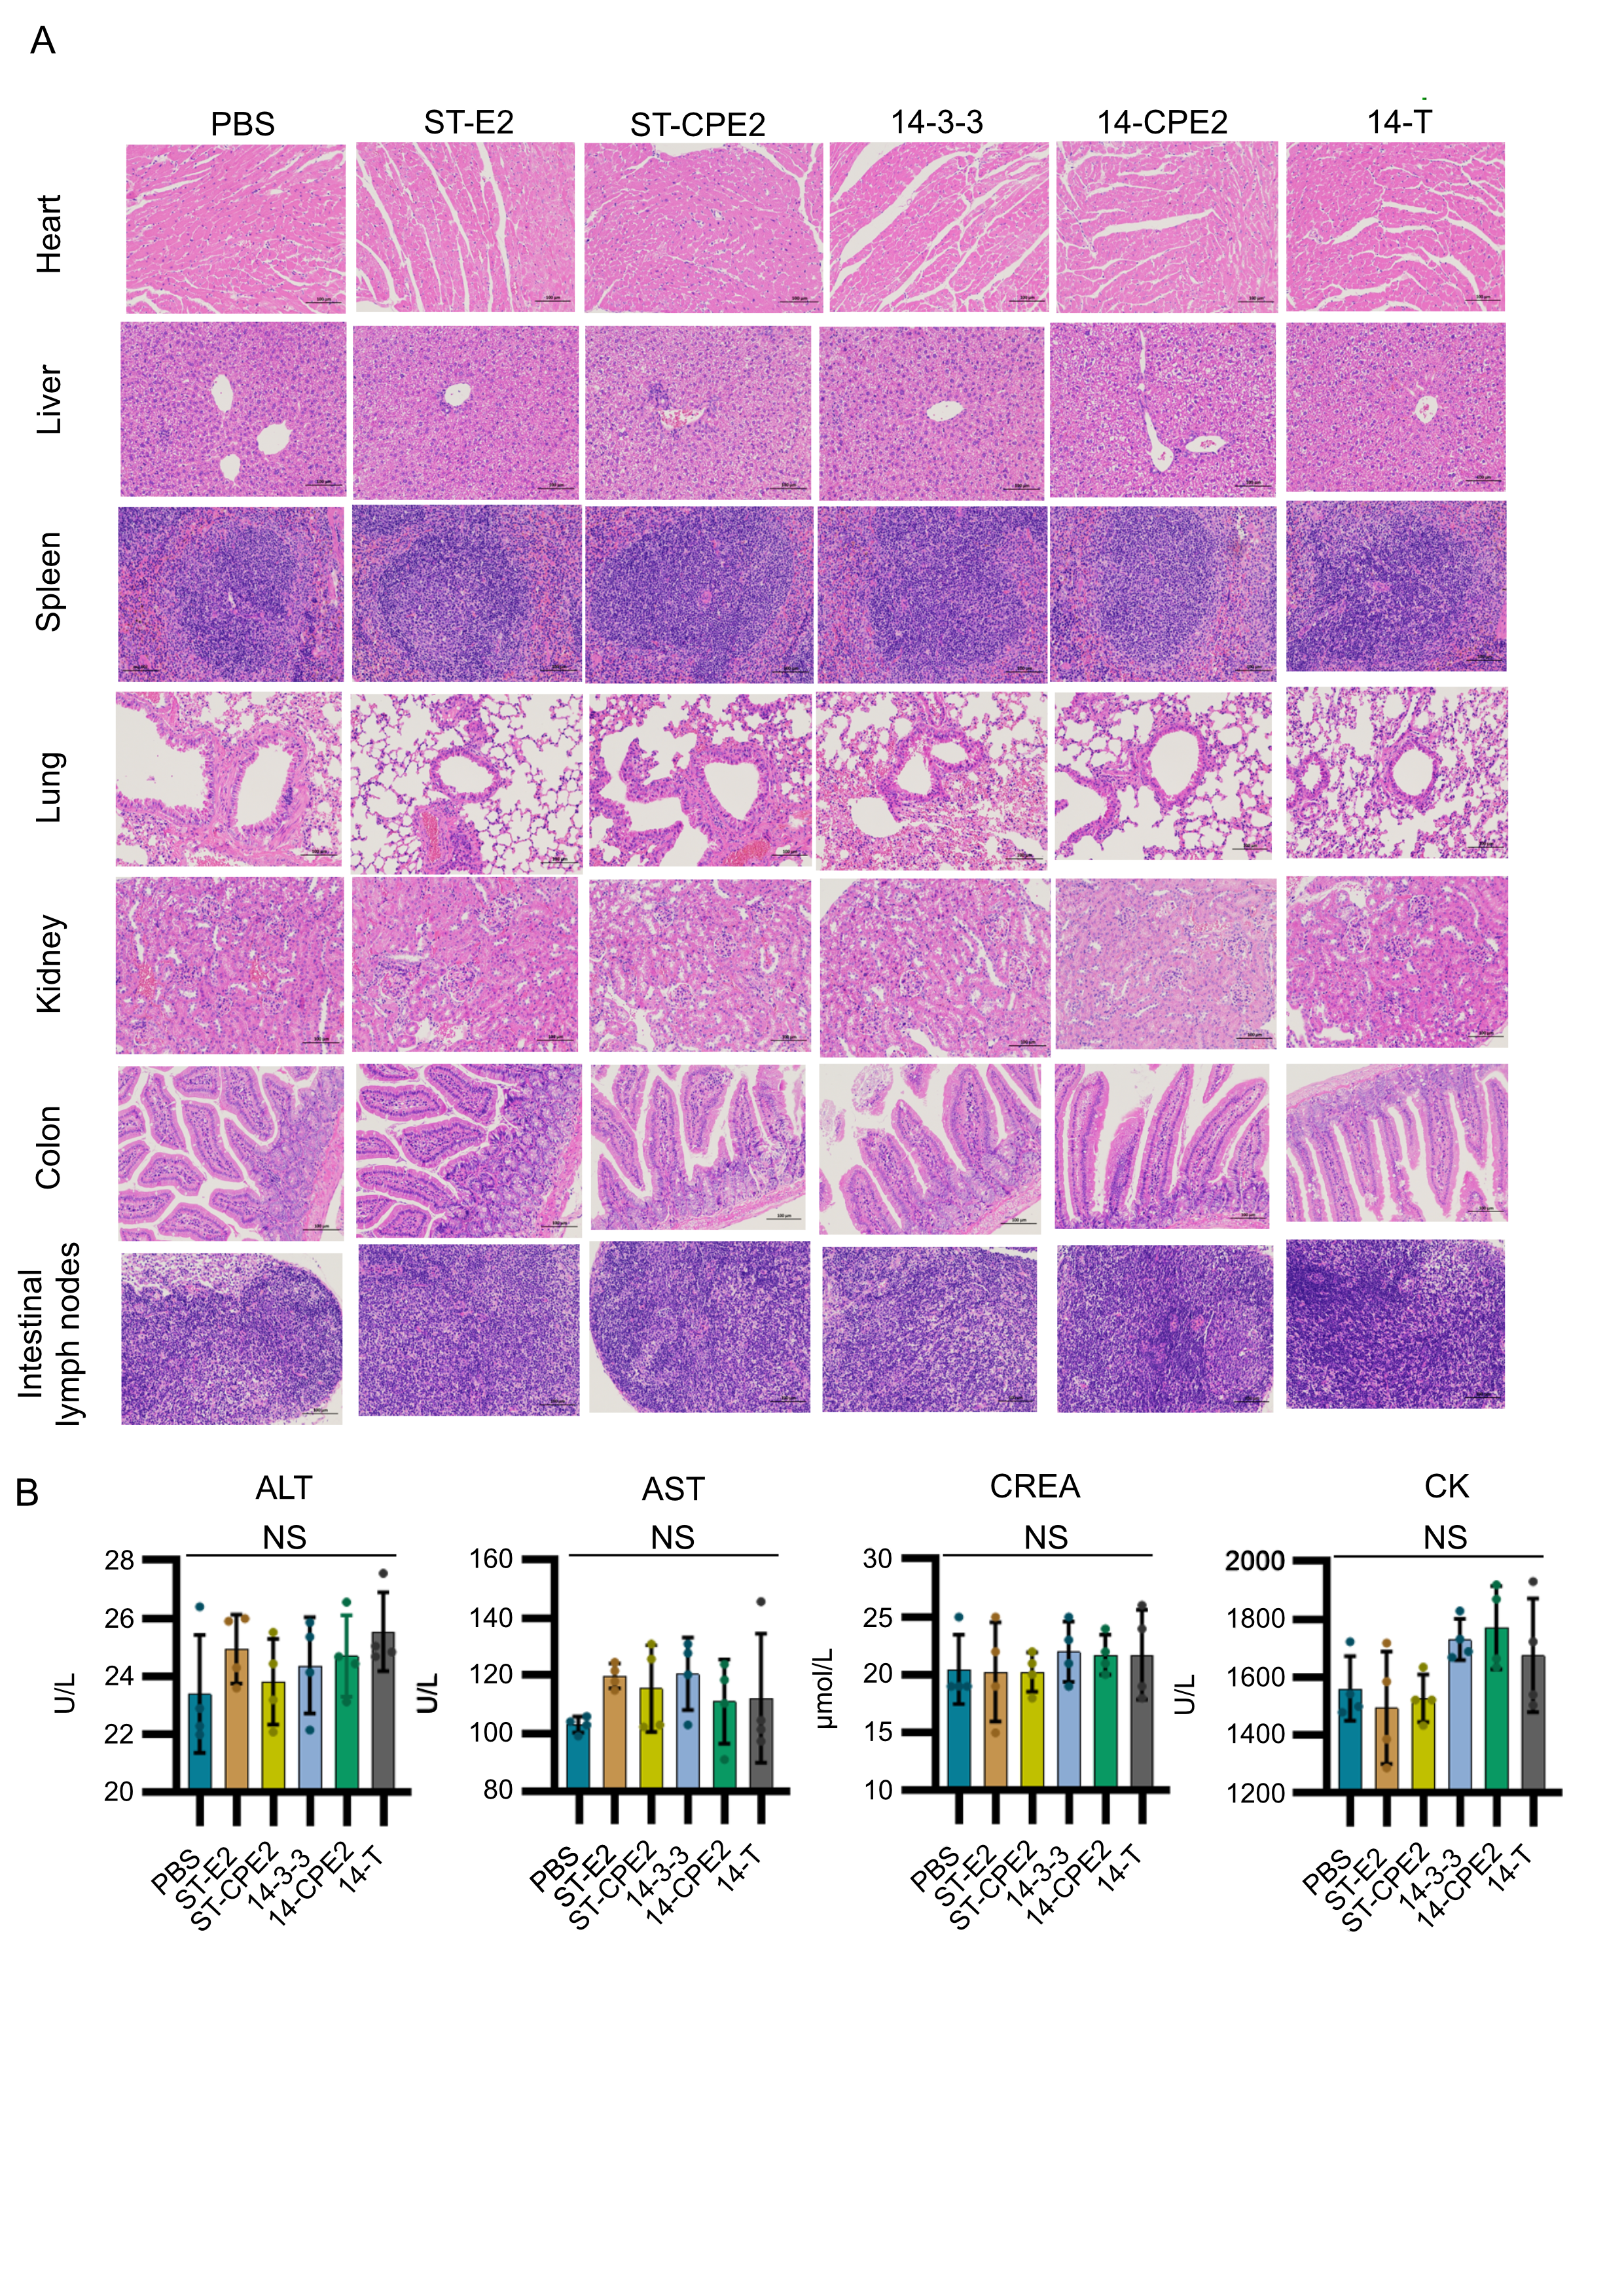


**Figure. S3 Safety Evaluation of Protein Nanoparticles.** (A) H&E staining of the heart, liver, spleen, lung, kidney, colon and mesenteric lymph nodes in mice post-immunization. (B) Levels of ALT, AST, CREA and CK in mouse serum. Statistical analyses were performed using one-way analysis of variance (one-way ANOVA) followed by Tukey’s post-hoc test for multiple comparisons. Differences were considered statistically significant at *P < 0.05*, *P < 0.01*and ***P < 0.001**; *ns** indicates no significant difference *(*P > 0.05*).

**Sequences of used protein**

ST-E2

AHIVMVDAYKAAAKPATTEGEFPETREKMSGIRRAIAKAMVHSKHTAPHVTLMDEADVTKLVAHRKKFKAIAAEKGIKLTFLPYVVKALVSALREYPVLNTSIDDETEEIIQKHYYNIGIAADTDRGLLVPVIKHADRKPIFALAQEINELAEKARDGKLTPGEMKGASCTITNIGSAGGQWFTPVINHPEVAILGIGRIAEKPIVRDGEIVAAPMLALSLSFDHRMIDGATAQKALNHIKRLLSDPELLLMEA

Amino acid sequence of E2; Spy Tag

ST-CPE2

AHIVMVDAYKPTKSDPELLLMEAGTGGSGSSAAAKPATTEGEFPETREKMSGIRRAIAKAMVHSKHTAPHVTLMDEADVTKLVAHRKKFKAIAAEKGIKLTFLPYVVKALVSALREYPVLNTSIDDETEEIIQKHYYNIGIAADTDRGLLVPVIKHADRKPIFALAQEINELAEKARDGKLTPGEMKGASCTITNIGSAGGQWFTPVINHPEVAILGIGRIAEKPIVRDGEIVAAPMLALSLSFDHRMIDGATAQKALNHIKRLL

Amino acid sequence of ST-CPE2; Spy Tag; CPE2

SC-14-3-3

VDTLSGLSSEQGQSGDMTIEEDSATHIKFSKRDEDGKELAGATMELRDSSGKTISTWISDGQVKDFYLYPGKYTFVETAAPDGYEVATAITFTVNEQGQVTVNGKATKGDAHIGGSGGSGMAAITSWITDSGCKDHASLVSIAKLAEQAERYEDMAVAMKTIAEMGNELNNEERNLLSVAYKNVVGARRSSWRIMSSIAKKQAGTPLADQTDIYLKKVEEELTKICNDVLALLSKNLITEKIGAEAKIFYYKMMGDYYRYLAEVQEGEQNDKSTEAAEEAYQKATSLAEAELSVTHPIRLGLALNFSVFYYEIKNMPEKACSLAKAAFDAAITEVDSIKDETYKDSTLIMQLLRDNLTVALELRV

Amino acid sequence of SC-14-3-3; Spy catcher; Linker; 14-3-3

14-CPE2

MAAITSWITDSGCKDHASLVSIAKLAEQAERYEDMAVAMKTIAEMGNELNNEERNLLSVAYKNVVGARRSSWRIMSSIAKKQAGTPLADQTDIYLKKVEEELTKICNDVLALLSKNLITEKIGAEAKIFYYKMMGDYYRYLAEVQEGEQNDKSTEAAEEAYQKATSLAEAELSVTHPIRLGLALNFSVFYYEIKNMPEKACSLAKAAFDAAITEVDSIKDETYKDSTLIMQLLRDNLTVALELRVGSGSPTKSDPELLLMEAGTGGSGSSAAAKPATTEGEFPETREKMSGIRRAIAKAMVHSKHTAPHVTLMDEADVTKLVAHRKKFKAIAAEKGIKLTFLPYVVKALVSALREYPVLNTSIDDETEEIIQKHYYNIGIAADTDRGLLVPVIKHADRKPIFALAQEINELAEKARDGKLTPGEMKGASCTITNIGSAGGQWFTPVINHPEVAILGIGRIAEKPIVRDGEIVAAPMLALSLSFDHRMIDGATAQKALNHIKRLL

Amino acid sequence of 14-CPE2; 14-3-3; Linker; CPE2

Em14-3-3

MAAITSWITDSGCKDHASLVSIAKLAEQAERYEDMAVAMKTIAEMGNELNNEERNLLSVAYKNVVGARRSSWRIMSSIAKKQAGTPLADQTDIYLKKVEEELTKICNDVLALLSKNLITEKIGAEAKIFYYKMMGDYYRYLAEVQEGEQNDKSTEAAEEAYQKATSLAEAELSVTHPIRLGLALNFSVFYYEIKNMPEKACSLAKAAFDAAITEVDSIKDETYKDSTLIMQLLRDNLTVALELRV

Amino acid sequence of 14-3-3[1].

[1] W. Wei, L. Wang, P. Zhou, B. Jiang, H. Liu, L. Feng, R.L. Ge, F. Tang, R. Li, Bioinformatic prediction and identification of immunogenic epitopes of the antigenic 14-3-3 protein of Echinococcus multilocularis, Acta Trop 220 (2021) 105955.<http://dx.dio.org/10.1016/j.actatropica.2021.10595510.1016/j.actatropica.2021.105955>
